# Supplementary material
Source: publisher figshare collection journal article supplement (https://gsajournals.figshare.com/ndownloader/files/15604187)
Supplement: Supplementary file 1 [file 15604187]

## Sheet: Sheet1
Table S2 Top hits identified in MAT locus LOH screen
Systematic Name	Standard Name	Cumulative “+” Score	Replicated in MET15 Screen	Essential/Non-Essential
YBR018C	GAL7	12	Yes	Non-Essential
YBR135W	CKS1	12	Yes	Non-Essential
YCL012W	-	12	No	Non-Essential
YDL097C	RPN6	12	Yes	Essential
YFL060C	SNO3	12	Yes	Non-Essential
YKR073C	-	12	No	Non-Essential
YMR289W	ABZ2	12	No	Non-Essential
YOR035C	SHE4	12	No	Non-Essential
YBL045C	COR1	13	No	Non-Essential
YDR201W	SPC19	13	No	Essential
YDR477W	SNF1	13	Yes	Non-Essential
YDR517W	GRH1	13	Yes	Non-Essential
YER112W	LSM4	13	Yes	Essential
YGL181W	GTS1	13	Yes	Non-Essential
YGL216W	KIP3	13	Yes	Non-Essential
YHR151C	MTC6	13	No	Non-Essential
YHR198C	AIM18	13	No	Non-Essential
YIL032C	-	13	No	Non-Essential
YIR005W	IST3	13	Yes	Non-Essential
YJR148W	BAT2	13	No	Non-Essential
YKL138C-A	HSK3	13	Yes	Essential
YLR285W	NNT1	13	Yes	Non-Essential
YLR343W	GAS2	13	Yes	Non-Essential
YLR374C	-	13	No	Non-Essential
YLR381W	CTF3	13	No	Non-Essential
YMR153C-A	-	13	No	Non-Essential
YNL317W	PFS2	13	Yes	Essential
YPL080C	-	13	No	Non-Essential
YPL201C	YIG1	13	No	Non-Essential
YPR021C	AGC1	13	Yes	Non-Essential
YBR133C	HSL7	13	No	Non-Essential
YDL077C	VAM6	13	No	Non-Essential
YOL081W	IRA2	13	No	Non-Essential
YBR165W	UBS1	14	No	Non-Essential
YDL013W	SLX5	14	Yes	Non-Essential
YDL104C	QRI7	14	No	Non-Essential
YDR091C	RLI1	14	Yes	Essential
YDR160W	SSY1	14	No	Essential
YDR198C	RKM2	14	Yes	Non-Essential
YDR237W	MRPL7	14	No	Non-Essential
YDR303C	RSC3	14	Yes	Essential
YDR330W	UBX5	14	No	Non-Essential
YER033C	ZRG8	14	Yes	Non-Essential
YER124C	DSE1	14	Yes	Non-Essential
YER131W	RPS26B	14	No	Non-Essential
YER159C	BUR6	14	Yes	Essential
YGL113W	SLD3	14	No	Essential
YGL226W	MTC3	14	No	Non-Essential
YGL228W	SHE10	14	No	Non-Essential
YGR006W	PRP18	14	No	Non-Essential
YGR032W	GSC2	14	Yes	Non-Essential
YGR201C	-	14	No	Non-Essential
YHR016C	YSC84	14	No	Non-Essential
YHR072W	ERG7	14	No	Essential
YJL078C	PRY3	14	Yes	Non-Essential
YJR099W	YUH1	14	No	Non-Essential
YKL033W	TTI1	14	No	Essential
YKR076W	ECM4	14	No	Non-Essential
YLL014W	EMC6	14	No	Non-Essential
YLR028C	ADE16	14	Yes	Non-Essential
YLR038C	COX12	14	No	Non-Essential
YLR064W	PER33	14	No	Non-Essential
YML037C	-	14	No	Non-Essential
YMR300C	ADE4	14	No	Non-Essential
YNL064C	YDJ1	14	No	Non-Essential
YNL146W	-	14	No	Non-Essential
YNL212W	VID27	14	Yes	Non-Essential
YOL123W	HRP1	14	Yes	Essential
YOR215C	AIM41	14	No	Non-Essential
YOR233W	KIN4	14	No	Non-Essential
YOR384W	FRE5	14	No	Non-Essential
YPL087W	YDC1	14	No	Non-Essential
YPL097W	MSY1	14	No	Non-Essential
YAR018C	KIN3	14	No	Non-Essential
YKL187C	FAT3	14	No	Non-Essential
YBR096W	-	15	Yes	Non-Essential
YBR139W	-	15	Yes	Non-Essential
YCL005W	LDB16	15	No	Non-Essential
YDL055C	PSA1	15	Yes	Essential
YDL166C	FAP7	15	No	Essential
YDL211C	-	15	Yes	Non-Essential
YDR037W	KRS1	15	No	Essential
YDR150W	NUM1	15	No	Non-Essential
YDR315C	IPK1	15	Yes	Non-Essential
YDR354W	TRP4	15	No	Non-Essential
YDR368W	YPR1	15	No	Non-Essential
YDR373W	FRQ1	15	No	Essential
YDR446W	ECM11	15	Yes	Non-Essential
YER059W	PCL6	15	Yes	Non-Essential
YER087C-A	-	15	Yes	Non-Essential
YER109C	FLO8	15	No	Non-Essential
YER113C	TMN3	15	Yes	Non-Essential
YER135C	-	15	Yes	Non-Essential
YER167W	BCK2	15	Yes	Non-Essential
YFL035C-A	MOB2	15	No	Essential
YGL208W	SIP2	15	No	Non-Essential
YHL028W	WSC4	15	No	Non-Essential
YHR117W	TOM71	15	No	Non-Essential
YIL025C	-	15	No	Non-Essential
YIL060W	-	15	Yes	Non-Essential
YIL090W	ICE2	15	Yes	Non-Essential
YJL009W	-	15	Yes	Essential
YJL108C	PRM10	15	No	Non-Essential
YJL111W	CCT7	15	Yes	Essential
YJL178C	ATG27	15	No	Non-Essential
YJR032W	CPR7	15	No	Non-Essential
YJR055W	HIT1	15	Yes	Non-Essential
YKL018C-A	MCO12	15	Yes	Non-Essential
YLR066W	SPC3	15	No	Essential
YLR300W	EXG1	15	No	Non-Essential
YLR303W	MET17	15	No	Non-Essential
YLR403W	SFP1	15	No	Non-Essential
YML095C-A	-	15	Yes	Non-Essential
YMR307W	GAS1	15	No	Non-Essential
YNL108C	-	15	No	Non-Essential
YNL146C-A	-	15	No	Non-Essential
YNL238W	KEX2	15	No	Non-Essential
YNL254C	RTC4	15	Yes	Non-Essential
YNR069C	BSC5	15	No	Non-Essential
YOL096C	COQ3	15	No	Non-Essential
YOL104C	NDJ1	15	No	Non-Essential
YOL135C	MED7	15	Yes	Essential
YOR045W	TOM6	15	No	Non-Essential
YOR073W	SGO1	15	Yes	Non-Essential
YOR262W	GPN2	15	No	Essential
YOR295W	UAF30	15	No	Non-Essential
YOR298W	MUM3	15	No	Non-Essential
YPL088W	-	15	No	Non-Essential
YPR052C	NHP6A	15	No	Non-Essential
YPR075C	OPY2	15	Yes	Non-Essential
YPR097W	-	15	Yes	Non-Essential
YPR187W	RPO26	15	Yes	Essential
YAL005C	SSA1	15	No	Non-Essential
YBL032W	HEK2	15	No	Non-Essential
YBL091C MAP2		15	No	Non-Essential
YBR107C IML3		15	Yes	Non-Essential
YIL132C CSM2		15	No	Non-Essential
YLR342W-A		15	No	Non-Essential
YKR078W	-	16	No	Non-Essential
YBL021C	HAP3	16	No	Non-Essential
YPL273W	SAM4	16	No	Non-Essential
YFL008W	SMC1	16	No	Essential
YER157W	COG3	16	No	Non-Essential
YBL023C	MCM2	16	No	Essential
YOL134C	-	16	No	Essential
YNR043W	MVD1	16	No	Essential
YNL169C	PSD1	16	No	Non-Essential
YNL098C	RAS2	16	No	Non-Essential
YBR105C	VID24	16	No	Non-Essential
YCL061C	MRC1	16	No	Non-Essential
YDL001W	RMD1	16	No	Non-Essential
YDL063C	SYO1	16	No	Non-Essential
YDR097C	MSH6	16	No	Non-Essential
YHR029C	YHI9	16	No	Non-Essential
YIL053W	GPP1	16	No	Non-Essential
YIL126W	STH1	16	No	Essential
YJL008C	CCT8	16	No	Essential
YJR118C	IML1	16	No	Non-Essential
YNL004W	HRB1	16	No	Non-Essential
YMR119W-A	-	16	No	Non-Essential
YLR278C	-	16	No	Non-Essential
YIL046W	MET30	16	No	Essential
YIL073C	SPO22	16	No	Non-Essential
YIL142W	CCT2	16	No	Essential
YDR516C	EMI2	16	No	Non-Essential
YGL218W	-	16	No	Non-Essential
YDR029W	-	16	No	Non-Essential
YIL050W	PCL7	16	No	Non-Essential
YDR501W	PLM2	16	No	Non-Essential
YBR137W	-	16	Yes	Non-Essential
YBR141C	BMT2	16	Yes	Non-Essential
YBR151W	APD1	16	Yes	Non-Essential
YBR169C	SSE2	16	Yes	Non-Essential
YBR272C	HSM3	16	Yes	Non-Essential
YCL026C-A	FRM2	16	Yes	Non-Essential
YBR144C	-	16	Yes	Non-Essential
YAL067W-A	-	16	Yes	Non-Essential
YCR069W	CPR4	16	Yes	Non-Essential
YDL015C	TSC13	16	Yes	Essential
YDL028C	MPS1	16	Yes	Essential
YDL138W	RGT2	16	Yes	Non-Essential
YPR043W	RPL43A	16	Yes	Non-Essential
YDR509W	-	16	Yes	Non-Essential
YDR488C	PAC11	16	Yes	Non-Essential
YDR033W	MRH1	16	Yes	Non-Essential
YDL181W	INH1	16	Yes	Non-Essential
YMR122C	-	16	Yes	Non-Essential
YCR032W	BPH1	16	Yes	Non-Essential
YPL249C-A	RPL36B	16	Yes	Non-Essential
YOR364W	-	16	Yes	Non-Essential
YOR095C	RKI1	16	Yes	Essential
YOR072W	-	16	Yes	Non-Essential
YOL115W	PAP2	16	Yes	Non-Essential
YIL051C	MMF1	16	Yes	Non-Essential
YIL048W	NEO1	16	Yes	Essential
YML097C	VPS9	16	Yes	Non-Essential
YER129W	SAK1	16	Yes	Non-Essential
YMR105W-A	-	16	Yes	Non-Essential
YOR207C	RET1	16	Yes	Essential
YDR453C	TSA2	16	Yes	Non-Essential
YGR089W	NNF2	16	Yes	Non-Essential
YER130C	COM2	16	Yes	Non-Essential
YER181C	-	16	Yes	Non-Essential
YER185W	PUG1	16	Yes	Non-Essential
YIL087C	AIM19	16	Yes	Non-Essential
YER117W	RPL23B	16	Yes	Non-Essential
YGR028W	MSP1	16	Yes	Non-Essential
YJL004C	SYS1	16	Yes	Non-Essential
YJR010C-A	SPC1	16	Yes	Non-Essential
YJL120W	-	16	Yes	Non-Essential
YJR080C	AIM24	16	Yes	Non-Essential
YJR113C	RSM7	16	Yes	Non-Essential
YKL057C	NUP120	16	Yes	Non-Essential
YOL105C	WSC3	16	Yes	Non-Essential
YKR010C	TOF2	16	Yes	Non-Essential
YLR332W	MID2	16	Yes	Non-Essential
YML085C	TUB1	16	Yes	Essential
Table S2. Top hits identified in MAT locus LOH screen Two hundred and seventeen genes, when deleted, contribute to LOH at the MAT locus. Genes reported are listed based on the sum of the “+” scores of all four replicates of mating with a MATa or MATα haploid tester, with each mating type scored separately. Of the 217 genes identified, 17.5% of them are essential; genes that have systematic ORF id…
